# Supplementary material for: Impact of COVID-19 pandemic on mental health: An international study
Source: PubMed Central journal article supplement (PMC7774914; doi:10.1371/journal.pone.0244809), 2020-12-31
Supplement: pone.0244809.s002.pdf [file pone.0244809.s002.pdf]

**S2 Table.** Geodemographic predictors for Perceived Stress Scale.

|                                                                                                         |              | Perceived Stress Scale                                    |                        |                            |
|---------------------------------------------------------------------------------------------------------|--------------|-----------------------------------------------------------|------------------------|----------------------------|
|                                                                                                         | Mean (sd)    | Difference between country mean and overall mean (95% CI) | Effect Size $\ddagger$ | Effect Size Interpretation |
| Variable                                                                                                |              |                                                           |                        |                            |
| Country                                                                                                 |              |                                                           |                        |                            |
| Cyprus                                                                                                  | 17.05 (7.53) | -0.03 (-0.49, 0.44)                                       | -0.00                  | Tiny                       |
| Greece                                                                                                  | 16.68 (7.15) | -0.40 (-1.28, 0.47)                                       | -0.06                  | Very small                 |
| Switzerland                                                                                             | 16.30 (6.82) | -0.78 (-1.40, -0.16)                                      | -0.11                  | Small                      |
| Germany                                                                                                 | 16.85 (6.64) | -0.23 (-1.10, 0.63)                                       | -0.03                  | Tiny                       |
| Austria                                                                                                 | 15.84 (6.60) | -1.23 (-1.99, -0.48)                                      | -0.17                  | Small                      |
| UK                                                                                                      | 17.47 (8.05) | 0.39 (-1.05, 1.83)                                        | 0.05                   | Very small                 |
| Finland                                                                                                 | 16.49 (6.70) | -0.59 (-1.74, 0.57)                                       | -0.08                  | Very small                 |
| Spain                                                                                                   | 15.95 (7.91) | -1.13 (-1.96, -0.29)                                      | -0.16                  | Small                      |
| Ireland                                                                                                 | 15.94 (7.82) | -1.14 (-1.85, -0.43)                                      | -0.16                  | Small                      |
| Italy                                                                                                   | 16.67 (6.53) | -0.41 (-0.88, 0.05)                                       | -0.06                  | Very small                 |
| Latvia                                                                                                  | 17.68 (8.38) | 0.60 (0.20, 1.00)                                         | 0.08                   | Very small                 |
| France                                                                                                  | 15.77 (7.68) | -1.32 (-2.13, -0.50)                                      | -0.18                  | Small                      |
| Colombia                                                                                                | 16.21 (8.52) | -0.86 (-1.52, -0.21)                                      | -0.12                  | Small                      |
| Poland                                                                                                  | 18.47 (6.68) | 1.38 (0.14, 2.63)                                         | 0.19                   | Small                      |
| Romania                                                                                                 | 17.29 (7.42) | 0.21 (-0.58, 0.99)                                        | 0.03                   | Tiny                       |
| Hungary                                                                                                 | 16.88 (7.52) | -0.20 (-1.07, 0.68)                                       | -0.03                  | Tiny                       |
| Portugal                                                                                                | 14.59 (7.40) | -2.50 (-3.29, -1.71)                                      | -0.35                  | Large                      |
| Turkey                                                                                                  | 19.55 (6.53) | 2.47 (1.93, 3.02)                                         | 0.34                   | Large                      |
| USA                                                                                                     | 18.22 (7.96) | 1.14 (0.26, 2.02)                                         | 0.16                   | Small                      |
| Hong Kong                                                                                               | 19.93 (6.16) | 2.85 (2.22, 3.49)                                         | 0.39                   | Large                      |
| Montenegro                                                                                              | 13.78 (6.29) | -3.30 (-4.49, -2.11)                                      | -0.46                  | Very Large                 |
| $\ddagger$ Cohen's d value for the standardize difference between the country mean and the overall mean |              |                                                           |                        |                            |

Note: For these analyses, only countries with  $n \geq 100$  participants were included
