# Supplementary material for: Impact of COVID-19 pandemic on mental health: An international study
Source: PubMed Central journal article supplement (PMC7774914; doi:10.1371/journal.pone.0244809), 2020-12-31
Supplement: pone.0244809.s003.pdf [file pone.0244809.s003.pdf]

**S3 Table.** Geodemographic predictors for MSBS – Depression.

|                                                                                                       | <b>Mean (sd)</b> | <b>Difference between country mean and overall mean (95% CI)</b> | <b>Effect Size‡</b> | <b>Effect Size Interpretation</b> |
|-------------------------------------------------------------------------------------------------------|------------------|------------------------------------------------------------------|---------------------|-----------------------------------|
| <b>Variable</b>                                                                                       |                  |                                                                  |                     |                                   |
| <b>Country</b>                                                                                        |                  |                                                                  |                     |                                   |
| Cyprus                                                                                                | 0.54 (2.28)      | 0.54 (0.40, 0.69)                                                | 0.23                | Medium                            |
| Greece                                                                                                | 0.33 (2.36)      | 0.34 (0.07, 0.62)                                                | 0.15                | Small                             |
| Switzerland                                                                                           | -0.20 (2.27)     | -0.19 (-0.38, 0.00)                                              | -0.08               | Very small                        |
| Germany                                                                                               | -0.16 (2.30)     | -0.15 (-0.42, 0.12)                                              | -0.07               | Very small                        |
| Austria                                                                                               | -0.72 (2.18)     | -0.71 (-0.95, -0.47)                                             | -0.31               | Large                             |
| UK                                                                                                    | 0.34 (2.66)      | 0.35 (-0.11, 0.80)                                               | 0.15                | Small                             |
| Finland                                                                                               | -0.36 (2.18)     | -0.35 (-0.71, 0.01)                                              | -0.16               | Small                             |
| Spain                                                                                                 | 0.24 (2.38)      | 0.25 (-0.02, 0.51)                                               | 0.11                | Small                             |
| Ireland                                                                                               | -0.04 (2.32)     | -0.03 (-0.25, 0.19)                                              | -0.01               | Tiny                              |
| Italy                                                                                                 | -0.23 (2.27)     | -0.22 (-0.36, -0.07)                                             | -0.09               | Very small                        |
| Latvia                                                                                                | -0.58 (2.44)     | -0.57 (-0.70, -0.45)                                             | -0.24               | Small                             |
| France                                                                                                | -0.10 (2.32)     | -0.09 (-0.35, 0.16)                                              | -0.04               | Tiny                              |
| Colombia                                                                                              | 0.22 (2.40)      | 0.22 (0.02, 0.43)                                                | 0.10                | Small                             |
| Poland                                                                                                | 0.20 (2.14)      | 0.21 (-0.18, 0.60)                                               | 0.09                | Very small                        |
| Romania                                                                                               | 0.28 (2.15)      | 0.29 (0.05, 0.54)                                                | 0.13                | Small                             |
| Hungary                                                                                               | -0.16 (2.38)     | -0.15 (-0.42, 0.12)                                              | -0.07               | Very small                        |
| Portugal                                                                                              | -0.35 (2.06)     | -0.35 (-0.59, -0.10)                                             | -0.15               | Small                             |
| Turkey                                                                                                | 0.55 (2.44)      | 0.55 (0.38, 0.72)                                                | 0.24                | Medium                            |
| USA                                                                                                   | 0.85 (2.51)      | 0.85 (0.58, 1.13)                                                | 0.38                | Large                             |
| Hong Kong                                                                                             | 0.20 (1.97)      | 0.21 (0.01, 0.41)                                                | 0.09                | Small                             |
| Montenegro                                                                                            | -0.54 (2.12)     | -0.54 (-0.91, -0.16)                                             | -0.24               | Medium                            |
|                                                                                                       |                  |                                                                  |                     |                                   |
| <b>‡ Cohen’s d value for the standardize difference between the country mean and the overall mean</b> |                  |                                                                  |                     |                                   |

Note: For these analyses, only countries with  $n \geq 100$  participants were included
