# Supplementary material for: Impact of COVID-19 pandemic on mental health: An international study
Source: PubMed Central journal article supplement (PMC7774914; doi:10.1371/journal.pone.0244809), 2020-12-31
Supplement: pone.0244809.s004.pdf [file pone.0244809.s004.pdf]

**S4 Table.** Geodemographic predictors for PANAS Positive.

|                                                                                                       | <b>Mean (sd)</b> | <b>Difference between country mean and overall mean (95% CI)</b> | <b>Effect Size‡</b> | <b>Effect Size Interpretation</b> |
|-------------------------------------------------------------------------------------------------------|------------------|------------------------------------------------------------------|---------------------|-----------------------------------|
| <b>Variable</b>                                                                                       |                  |                                                                  |                     |                                   |
| <b>Country</b>                                                                                        |                  |                                                                  |                     |                                   |
| Cyprus                                                                                                | 30.87 (8.86)     | 1.82 (1.32, 2.31)                                                | 0.22                | Medium                            |
| Greece                                                                                                | 31.21 (8.15)     | 2.16 (1.23, 3.10)                                                | 0.28                | Medium                            |
| Switzerland                                                                                           | 29.35 (7.34)     | 0.30 (-0.35, 0.96)                                               | 0.04                | Tiny                              |
| Germany                                                                                               | 28.90 (7.43)     | -0.15 (-1.07, 0.77)                                              | -0.02               | Tiny                              |
| Austria                                                                                               | 30.44 (7.24)     | 1.40 (0.59, 2.20)                                                | 0.18                | Tiny                              |
| UK                                                                                                    | 28.35 (9.40)     | -0.70 (-2.24, 0.84)                                              | -0.09               | Very Small                        |
| Finland                                                                                               | 26.09 (5.36)     | -2.96 (-4.19, -1.73)                                             | -0.39               | Large                             |
| Spain                                                                                                 | 29.98 (8.28)     | 0.93 (0.04, 1.83)                                                | 0.12                | Small                             |
| Ireland                                                                                               | 28.35 (8.97)     | -0.70 (-1.45, 0.06)                                              | -0.09               | Very Small                        |
| Italy                                                                                                 | 28.42 (7.18)     | -0.63 (-1.13, -0.13)                                             | -0.08               | Very Small                        |
| Latvia                                                                                                | 27.38 (7.66)     | -1.66 (-2.09, -1.23)                                             | -0.20               | Medium                            |
| France                                                                                                | 29.60 (7.18)     | 0.54 (-0.33, 1.41)                                               | 0.07                | Very Small                        |
| Colombia                                                                                              | 30.36 (8.82)     | 1.31 (0.61, 2.01)                                                | 0.17                | Small                             |
| Poland                                                                                                | 25.59 (7.97)     | -3.46 (-4.78, -2.13)                                             | -0.45               | Very Large                        |
| Romania                                                                                               | 29.42 (7.21)     | 0.38 (-0.46, 1.21)                                               | 0.05                | Very Small                        |
| Hungary                                                                                               | 30.89 (7.99)     | 1.84 (0.91, 2.77)                                                | 0.24                | Medium                            |
| Portugal                                                                                              | 32.01 (7.43)     | 2.96 (2.12, 3.80)                                                | 0.38                | Large                             |
| Turkey                                                                                                | 30.47 (8.17)     | 1.42 (0.84, 2.00)                                                | 0.18                | Small                             |
| USA                                                                                                   | 24.83 (8.48)     | -4.22 (-5.16, -3.28)                                             | -0.54               | Very Large                        |
| Hong Kong                                                                                             | 25.66 (7.22)     | -3.38 (-4.06, -2.71)                                             | -0.43               | Very Large                        |
| Montenegro                                                                                            | 30.77 (6.36)     | 1.72 (0.45, 2.99)                                                | 0.22                | Medium                            |
| <b>‡ Cohen's d value for the standardize difference between the country mean and the overall mean</b> |                  |                                                                  |                     |                                   |

Note: For these analyses, only countries with  $n \geq 100$  participants were included
