# Supplementary material for: Impact of COVID-19 pandemic on mental health: An international study
Source: PubMed Central journal article supplement (PMC7774914; doi:10.1371/journal.pone.0244809), 2020-12-31
Supplement: pone.0244809.s005.pdf [file pone.0244809.s005.pdf]

**S5 Table.** Geodemographic predictors for PANAS Negative.

|                                                                                                       | <b>Mean (sd)</b> | <b>Difference between country mean and overall mean (95% CI)</b> | <b>Effect Size‡</b> | <b>Effect Size Interpretation</b> |
|-------------------------------------------------------------------------------------------------------|------------------|------------------------------------------------------------------|---------------------|-----------------------------------|
| <b>Variable</b>                                                                                       |                  |                                                                  |                     |                                   |
| <b>Country</b>                                                                                        |                  |                                                                  |                     |                                   |
| Cyprus                                                                                                | 30.07 (11.64)    | -0.32 (-1.04, 0.40)                                              | -0.03               | Tiny                              |
| Greece                                                                                                | 30.35 (11.04)    | -0.03 (-1.38, 1.32)                                              | 0.00                | Tiny                              |
| Switzerland                                                                                           | 25.42 (8.91)     | -4.96 (-5.91, -4.01)                                             | -0.44               | Very Large                        |
| Germany                                                                                               | 25.68 (8.46)     | -4.70 (-6.03, -3.37)                                             | -0.42               | Very Large                        |
| Austria                                                                                               | 23.90 (8.39)     | -6.49 (-7.65, -5.33)                                             | -0.58               | Very Large                        |
| UK                                                                                                    | 29.32 (10.56)    | -1.06 (-3.29, 1.16)                                              | -0.09               | Very Small                        |
| Finland                                                                                               | 37.95 (14.61)    | 7.57 (5.80, 9.34)                                                | 0.67                | Very Large                        |
| Spain                                                                                                 | 31.53 (10.98)    | 1.15 (-0.14, 2.44)                                               | 0.10                | Small                             |
| Ireland                                                                                               | 28.05 (10.74)    | -2.33 (-3.43, -1.24)                                             | -0.21               | Medium                            |
| Italy                                                                                                 | 31.33 (11.16)    | 0.95 (0.23, 1.66)                                                | 0.08                | Very Small                        |
| Latvia                                                                                                | 30.50 (12.20)    | 0.12 (-0.50, 0.74)                                               | 0.01                | Tiny                              |
| France                                                                                                | 30.87 (12.32)    | 0.49 (-0.76, 1.75)                                               | 0.04                | Tiny                              |
| Colombia                                                                                              | 32.73 (11.58)    | 2.34 (1.33, 3.35)                                                | 0.20                | Medium                            |
| Poland                                                                                                | 27.74 (10.92)    | -2.64 (-4.56, -0.73)                                             | -0.24               | Medium                            |
| Romania                                                                                               | 31.55 (12.11)    | 1.16 (-0.05, 2.37)                                               | 0.10                | Small                             |
| Hungary                                                                                               | 27.17 (10.95)    | -3.22 (-4.56, -1.87)                                             | -0.28               | Medium                            |
| Portugal                                                                                              | 27.98 (10.15)    | -2.40 (-3.61, -1.18)                                             | -0.21               | Medium                            |
| Turkey                                                                                                | 36.14 (12.55)    | 5.75 (4.92, 6.59)                                                | 0.49                | Very Large                        |
| USA                                                                                                   | 31.97 (11.90)    | 1.59 (0.23, 2.94)                                                | 0.14                | Small                             |
| Hong Kong                                                                                             | 33.54 (12.38)    | 3.15 (2.18, 4.13)                                                | 0.27                | Medium                            |
| Montenegro                                                                                            | 26.82 (8.48)     | -3.56 (-5.39, -1.73)                                             | -0.32               | Large                             |
|                                                                                                       |                  |                                                                  |                     |                                   |
| <b>‡ Cohen's d value for the standardize difference between the country mean and the overall mean</b> |                  |                                                                  |                     |                                   |

Note: For these analyses, only countries with  $n \geq 100$  participants were included
