# Supplementary material for: Impact of COVID-19 pandemic on mental health: An international study
Source: PubMed Central journal article supplement (PMC7774914; doi:10.1371/journal.pone.0244809), 2020-12-31
Supplement: pone.0244809.s006.pdf [file pone.0244809.s006.pdf]

**S6 Table.** Geodemographic predictors for MHCSF - Mental Health Continuum.

|                                                                                                       | <b>Mean (sd)</b> | <b>Difference between country mean and overall mean (95% CI)</b> | <b>Effect Size‡</b> | <b>Effect Size Interpretation</b> |
|-------------------------------------------------------------------------------------------------------|------------------|------------------------------------------------------------------|---------------------|-----------------------------------|
| <b>Variable</b>                                                                                       |                  |                                                                  |                     |                                   |
| <b>Country</b>                                                                                        |                  |                                                                  |                     |                                   |
| Cyprus                                                                                                | 41.63 (14.36)    | 0.59 ( -0.28, 1.46)                                              | 0.04                | Tiny                              |
| Greece                                                                                                | 41.41 (13.94)    | 0.37 (-1.26, 2.00)                                               | 0.03                | Tiny                              |
| Switzerland                                                                                           | 43.41 (13.22)    | 2.37 (1.22, 3.51)                                                | 0.17                | Small                             |
| Germany                                                                                               | 43.72 (12.51)    | 2.68 (1.07, 4.28)                                                | 0.20                | Medium                            |
| Austria                                                                                               | 45.98 (12.33)    | 4.95 (3.55, 6.34)                                                | 0.37                | Large                             |
| UK                                                                                                    | 39.67 (14.31)    | -1.37 (-4.10, 1.37)                                              | -0.10               | Small                             |
| Finland                                                                                               | 46.28 (12.65)    | 5.24 (3.10, 7.38)                                                | 0.39                | Large                             |
| Spain                                                                                                 | 41.92 (13.26)    | 0.89 (-0.68, 2.45)                                               | 0.07                | Very small                        |
| Ireland                                                                                               | 42.49 (15.33)    | 1.45 (0.13, 2.77)                                                | 0.11                | Small                             |
| Italy                                                                                                 | 36.68 (15.69)    | -4.36 (-11.06, 2.35)                                             | -0.33               | Large                             |
| Latvia                                                                                                | 40.40 (13.49)    | -0.64 (-1.39, 0.11)                                              | -0.05               | Very small                        |
| France                                                                                                | 39.36 (12.84)    | -1.68 (-3.20, -0.16)                                             | -0.12               | Small                             |
| Colombia                                                                                              | 43.10 (14.83)    | 2.06 (0.84, 3.27)                                                | 0.15                | Small                             |
| Poland                                                                                                | 34.28 (14.24)    | -6.76 (-9.07, -4.45)                                             | -0.50               | Very large                        |
| Romania                                                                                               | 38.27 (14.07)    | -2.77 (-4.23, -1.31)                                             | -0.20               | Medium                            |
| Hungary                                                                                               | 37.26 (13.89)    | -3.78 (-5.41, -2.16)                                             | -0.28               | Medium                            |
| Portugal                                                                                              | 45.62 (12.38)    | 4.59 (3.12, 6.05)                                                | 0.34                | Large                             |
| Turkey                                                                                                | 39.13 (13.88)    | -1.91 (-2.92, -0.89)                                             | -0.14               | Small                             |
| USA                                                                                                   | 41.25 (14.93)    | 0.21 (-1.42, 1.85)                                               | 0.02                | Tiny                              |
| Hong Kong                                                                                             | 34.19 (12.52)    | -6.84 (-8.02, -5.66)                                             | -0.50               | Very Large                        |
| Montenegro                                                                                            | 44.48 (12.57)    | 3.45 (1.23, 5.66)                                                | 0.26                | Medium                            |
|                                                                                                       |                  |                                                                  |                     |                                   |
| <b>‡ Cohen's d value for the standardize difference between the country mean and the overall mean</b> |                  |                                                                  |                     |                                   |

Note: For these analyses, only countries with n ≥ 100 participants were included
