# Supplementary material for: Impact of COVID-19 pandemic on mental health: An international study
Source: PubMed Central journal article supplement (PMC7774914; doi:10.1371/journal.pone.0244809), 2020-12-31

**S1 Appendix.** Participation Flowchart.

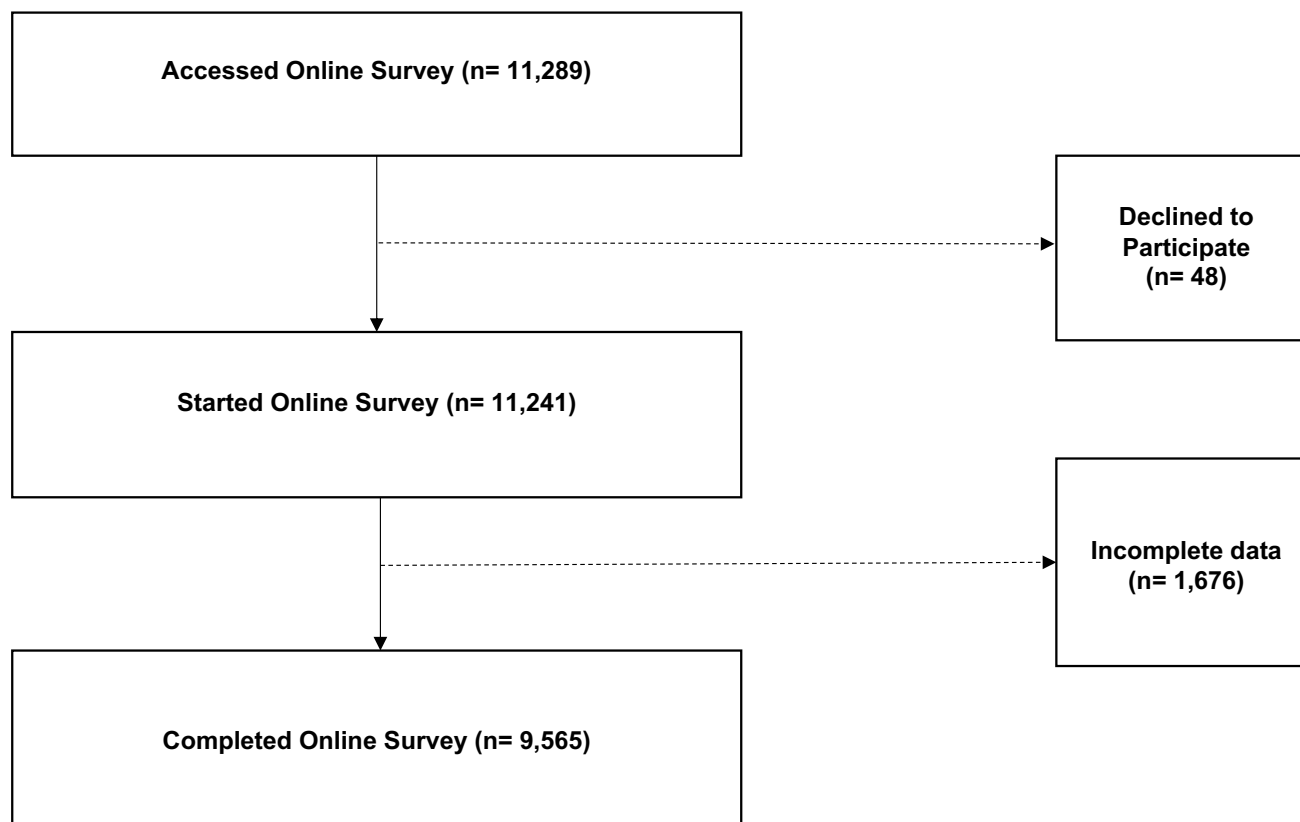

Supplement: pone.0244809.s007.pdf [file pone.0244809.s007.pdf]
